# Supplementary material
Source: PubMed Central journal article supplement (PMC7269359)

## **Table of Contents**

**Supplementary Table 1. Daily dietary intake in kidney stone formers versus controls.**

**Supplementary Table 2. Current/recent medication use in kidney stone formers versus controls.**

**Supplementary Figure 1. Heatmap of bacterial taxa in children with kidney stone disease and matched healthy controls.** Each column of the heatmap represents one fecal sample and each row represents one bacterial taxon. Taxa were included if the abundance in any sample exceeded 0.1%. (with the exception of Oxalobacteraceae and Oxalobacter formigenes which were included despite lower abundance due to their role in oxalate degradation). White cells denote taxa that were not observed in the sample.

**Supplement Table 1. Median daily dietary intake for participants**

| <b>Dietary Intake</b> | <b>Cases<br/>(N = 44)</b> | <b>Controls<br/>(N = 44)</b> | <b>P value*</b> |
|-----------------------|---------------------------|------------------------------|-----------------|
| Calcium (mg)          | 838.30                    | 1016.90                      | 0.11            |
| Fructose (mg)         | 18.18                     | 22.38                        | 0.03            |
| Magnesium (mg)        | 223.20                    | 264.50                       | 0.13            |
| Oxalic Acid (mg)      | 125.50                    | 157.80                       | 0.05            |
| Phytic Acid (mg)      | 561.10                    | 645.90                       | 0.24            |
| Potassium (mg)        | 1867.10                   | 2174.80                      | 0.08            |
| Butyric Acid (mg)     | 0.50                      | 0.51                         | 0.62            |
| Sodium (mg)           | 2793.50                   | 2980.40                      | 0.33            |
| Sucrose (mg)          | 36.25                     | 47.12                        | 0.07            |
| Total Protein (g)     | 62.71                     | 74.02                        | 0.04            |
| Water (mL)            | 2177.60                   | 1922.30                      | 0.02            |
| Zinc (mg)             | 8.63                      | 10.65                        | 0.08            |

\*Wilcoxon signed-rank test

| <b>Supplement Table 2. Current/recent medication use among cases and controls*</b> |              |                 |              |                  |
|------------------------------------------------------------------------------------|--------------|-----------------|--------------|------------------|
| <b>Medication</b>                                                                  | <b>Cases</b> | <b>Controls</b> | <b>Pairs</b> | <b>P value**</b> |
| Antacids                                                                           |              |                 | 31           | 0.25             |
| No                                                                                 | 33 (87%)     | 36 (100%)       |              |                  |
| Yes                                                                                | 5 (13%)      | 0 (0%)          |              |                  |
| NSAIDS                                                                             |              |                 | 31           | 0.61             |
| No                                                                                 | 31 (82%)     | 26 (72%)        |              |                  |
| Yes                                                                                | 7 (18%)      | 10 (28%)        |              |                  |
| Proton pump inhibitors                                                             |              |                 | 40           | 1.00             |
| No                                                                                 | 42 (100%)    | 42 (100%)       |              |                  |
| Yes                                                                                | 0 (0%)       | 0 (0%)          |              |                  |
| Histamine receptor antagonists                                                     |              |                 | 38           | 0.13             |
| No                                                                                 | 40 (98%)     | 35 (85%)        |              |                  |
| Yes                                                                                | 1 (2%)       | 6 (15%)         |              |                  |
| Narcotics                                                                          |              |                 | 38           | 0.50             |
| No                                                                                 | 39 (95%)     | 41 (100%)       |              |                  |
| Yes                                                                                | 2 (5%)       | 0 (0%)          |              |                  |
| Tricyclic antidepressants                                                          |              |                 | 39           | 0.50             |
| No                                                                                 | 38 (90%)     | 41 (100%)       |              |                  |
| Yes                                                                                | 4 (10%)      | 0 (0%)          |              |                  |
| Anticholinergics                                                                   |              |                 | 39           | 1.00             |
| No                                                                                 | 42 (100%)    | 41 (100%)       |              |                  |
| Yes                                                                                | 0 (%)        | 0 (%)           |              |                  |
| Metoclopramide                                                                     |              |                 | 39           | 1.00             |
| No                                                                                 | 42 (100%)    | 41 (100%)       |              |                  |
| Yes                                                                                | 0 (0%)       | 0 (0%)          |              |                  |
| Anti-diarrheal medications                                                         |              |                 | 40           | 1.00             |
| No                                                                                 | 42 (98%)     | 41 (100%)       |              |                  |
| Yes                                                                                | 1 (2%)       | 0 (0%)          |              |                  |
| Laxatives                                                                          |              |                 | 36           | 1.00             |
| No                                                                                 | 39 (98%)     | 40 (100%)       |              |                  |
| Yes                                                                                | 1 (3%)       | 0 (0%)          |              |                  |
| Current medication                                                                 |              |                 | 42           | 0.08             |
| No                                                                                 | 23 (53%)     | 32 (74%)        |              |                  |
| Yes                                                                                | 20 (47%)     | 11 (26%)        |              |                  |
| Number of meds                                                                     |              |                 |              |                  |
| 1                                                                                  | 6 (14%)      | 9 (21%)         |              |                  |
| 2                                                                                  | 6 (14%)      | 1 (2%)          |              |                  |
| 3                                                                                  | 6 (14%)      | 0 (0%)          |              |                  |
| 4                                                                                  | 1 (2%)       | 0 (0%)          |              |                  |
| 7                                                                                  | 0 (0%)       | 1 (2%)          |              |                  |
| 8                                                                                  | 1 (2%)       | 0 (0%)          |              |                  |

\*Antacids and NSAIDS within 2 weeks. Other listed medications within 4 weeks. \*\*Exact McNemar significance probability.

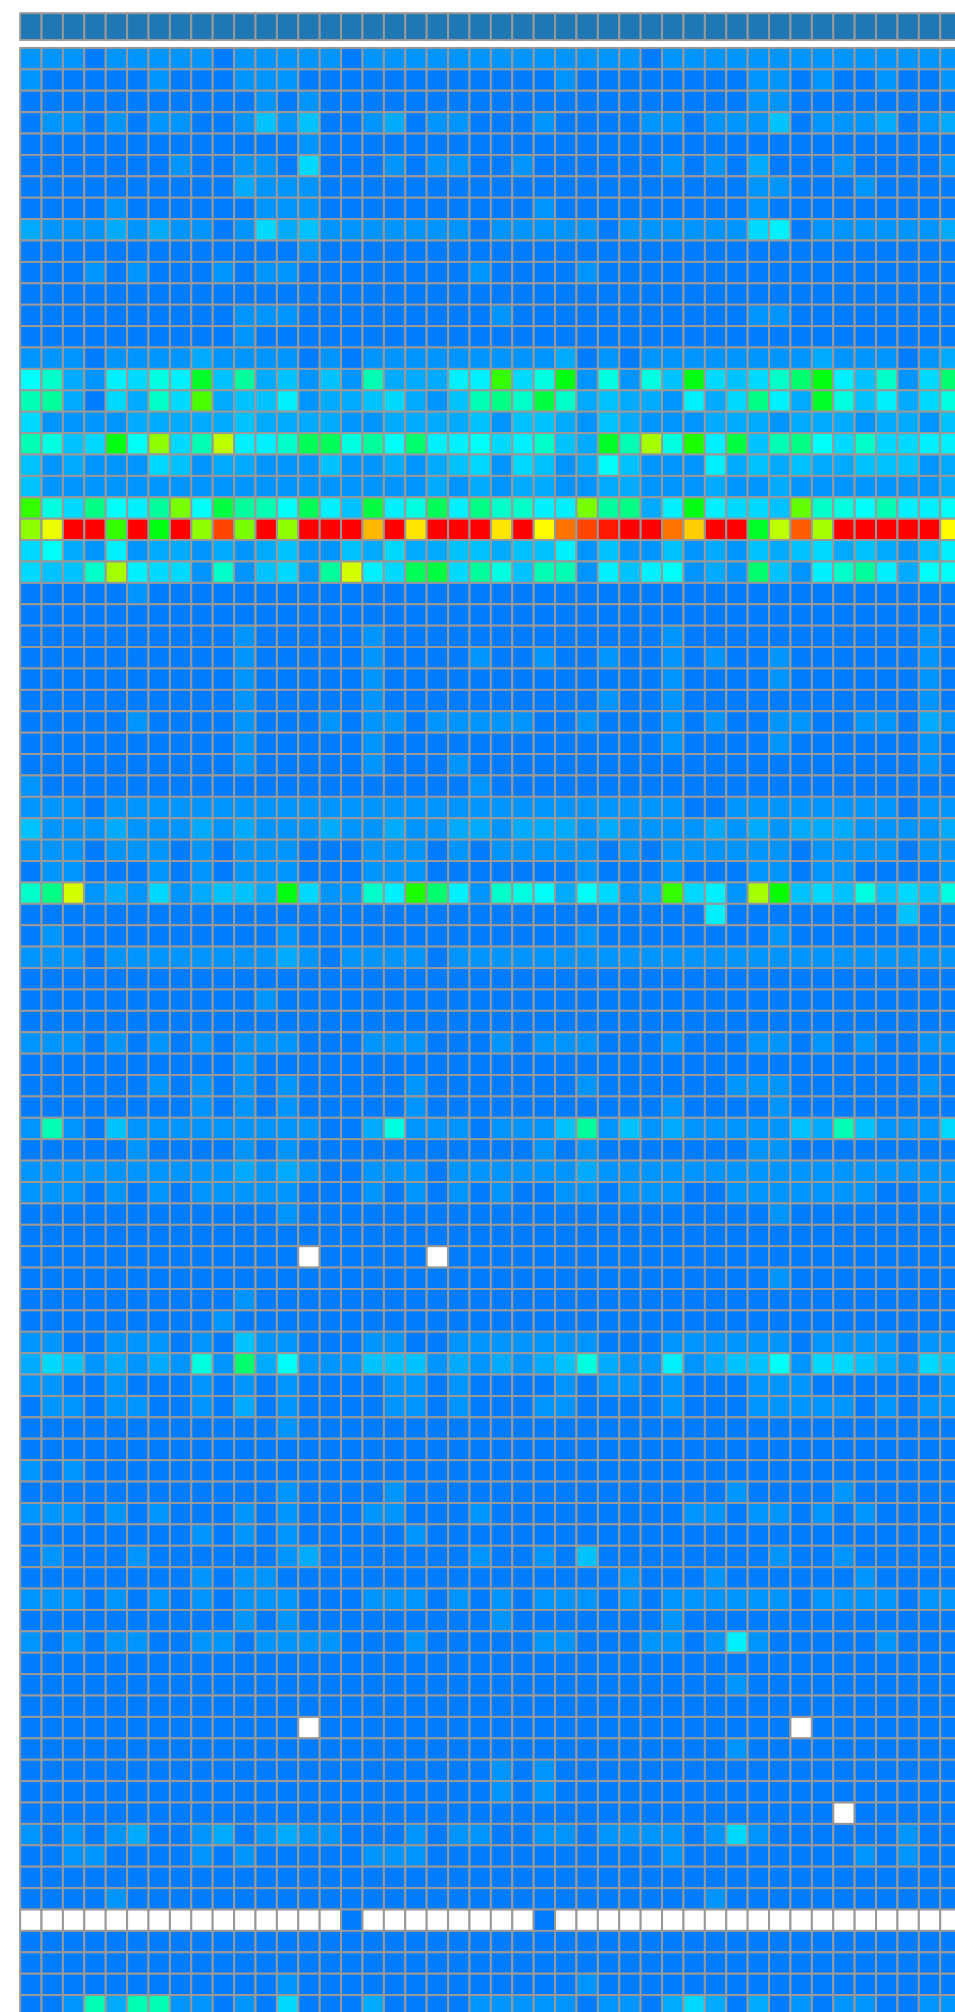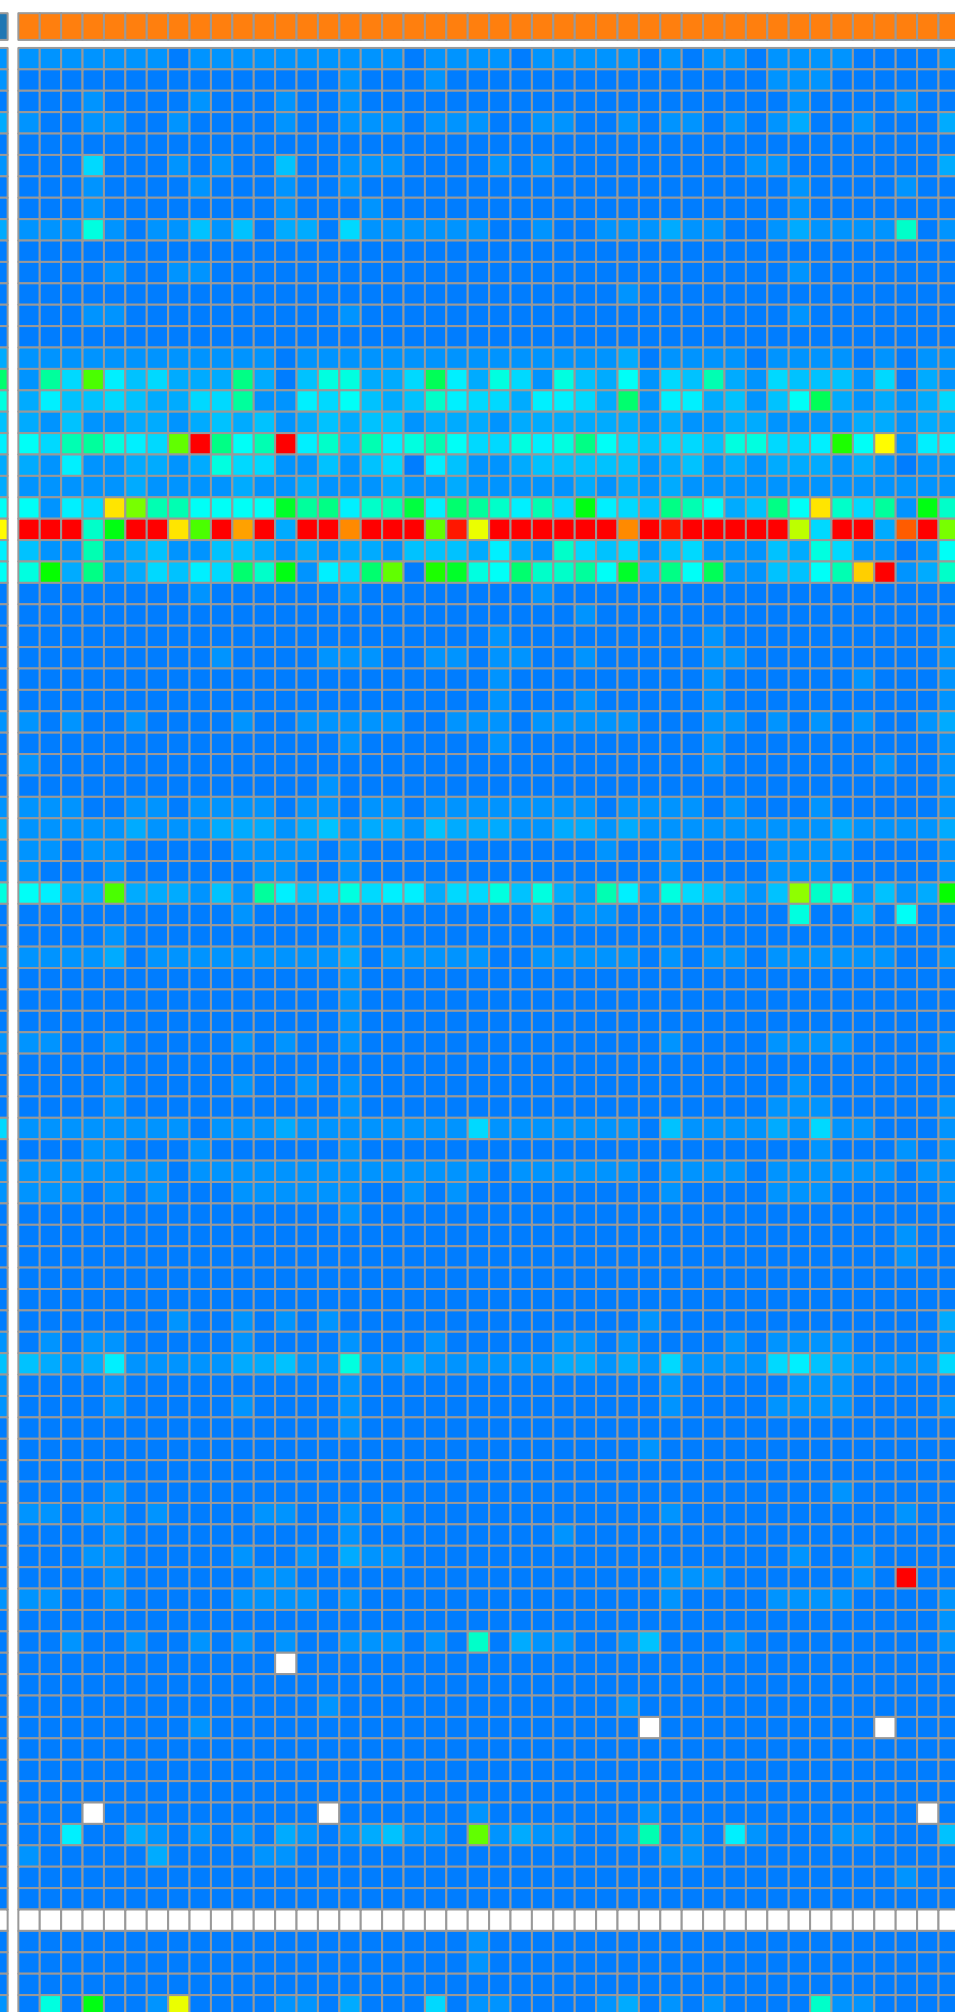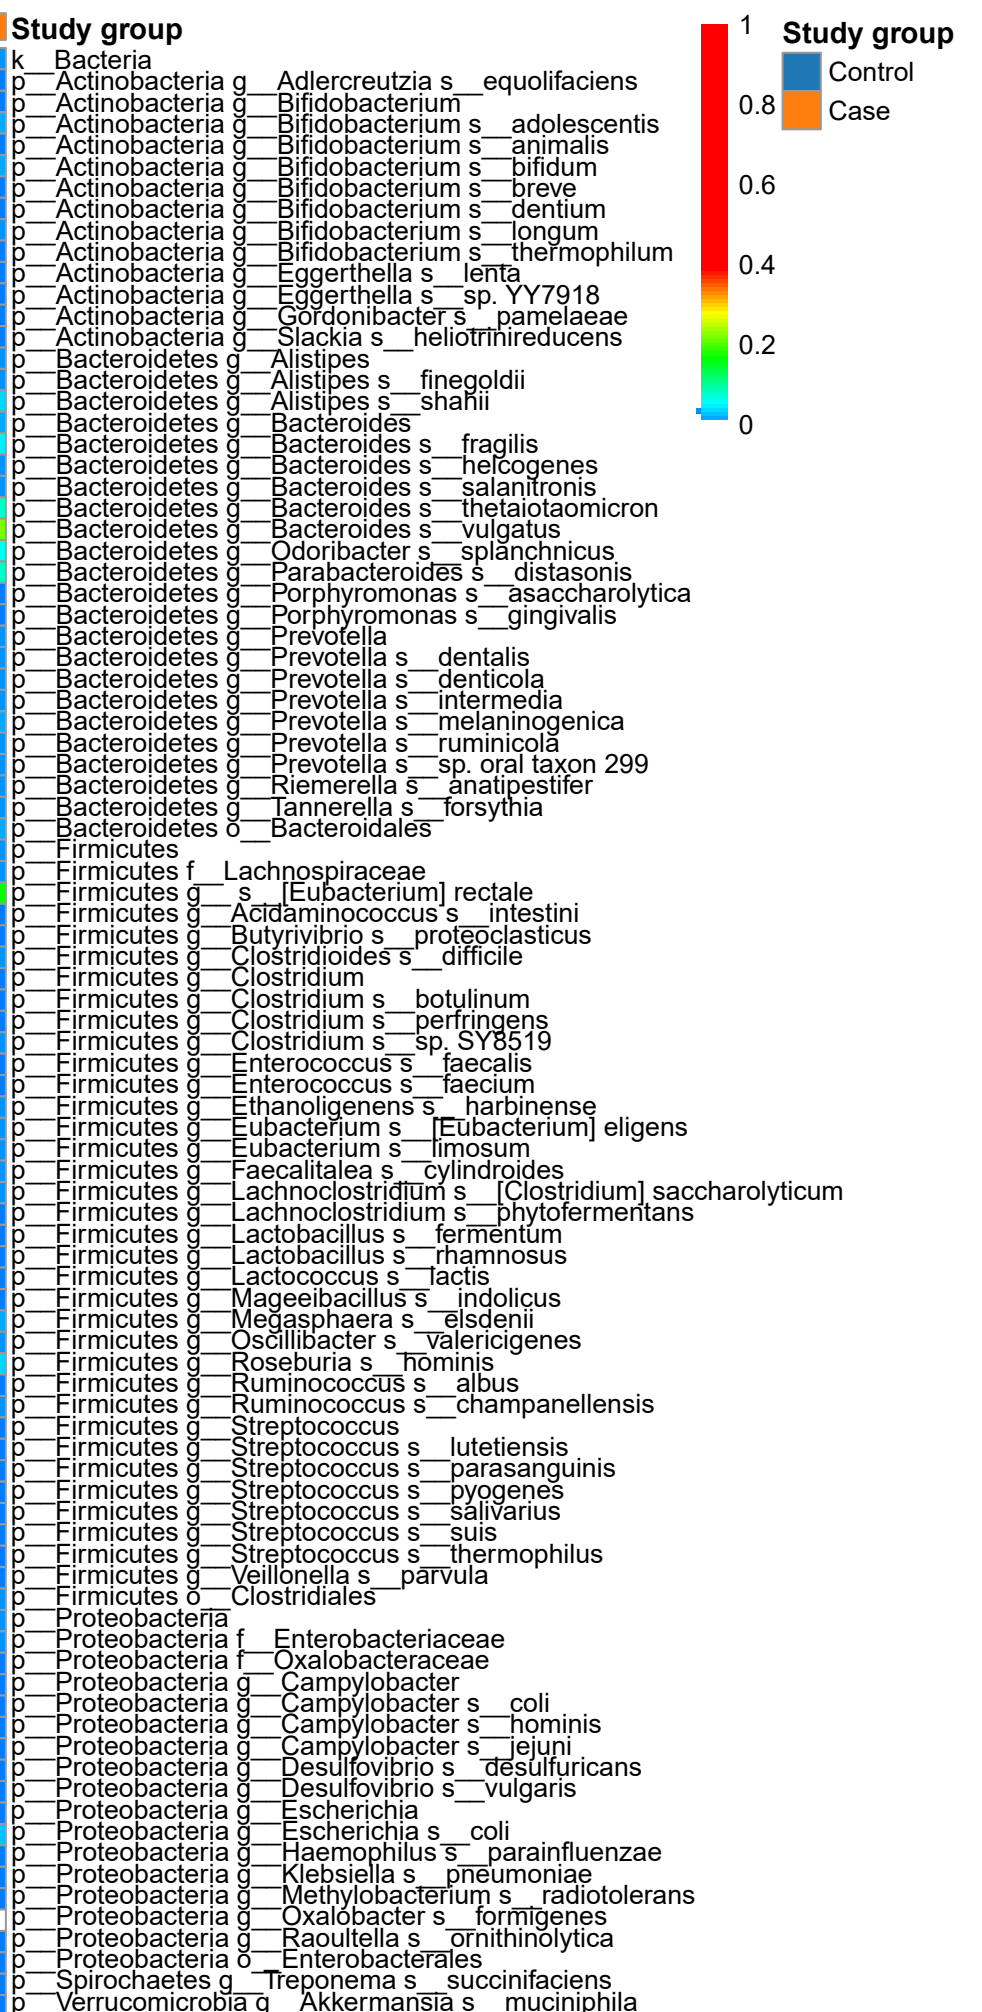

Supplement: ASN.2019101131SupplementaryData.pdf [file ASN.2019101131SupplementaryData.pdf]
